# Supplementary material for: Chromosomally Located fosA7 in Salmonella Isolates From China
Source: PubMed Central journal article supplement (PMC8751274; doi:10.3389/fmicb.2021.781306), 2021-12-28
Supplement: Data_Sheet_1.pdf [file Data_Sheet_1.pdf]

**Table S1. Characteristics of *fosA7* in Enterobacteriaceae from animals, food, human, and the environment**

| Gene           | Species                                         | <i>fosA7</i> location | Country      | sources                                                          | Reference              |
|----------------|-------------------------------------------------|-----------------------|--------------|------------------------------------------------------------------|------------------------|
| <i>fosA7</i>   | <i>S. Heidelberg</i>                            | Chromosome            | Canada       | chicken                                                          | Rehman et al., 2017    |
| <i>fosA7</i>   | <i>S. Heidelberg</i>                            | Chromosome            | USA          | ground Turkey, human                                             | Keefer et al., 2019    |
| <i>fosA7</i>   | <i>S. Heidelberg</i> ,<br><i>S. Derby</i>       | -                     | USA          | dog                                                              | Cummings et al., 2020  |
| <i>fosA7</i>   | <i>S. Derby</i>                                 | -                     | Brazil       | food, patient                                                    | de Melo et al., 2021   |
| <i>fosA7</i>   | <i>S. Infantis</i>                              | -                     | Serbia       | poultry farm                                                     | Jovčić et al., 2020    |
| <i>fosA7</i>   | <i>S. Agone</i>                                 | -                     | USA          | papaya                                                           | Pightling et al., 2020 |
| <i>fosA7</i>   | <i>S. Grumpensis</i> ,<br><i>S. Saphra</i>      | -                     | Brazil       | food (viscera, chicken meat, boneless chicken thigh)             | Monte et al., 2021     |
| <i>fosA7</i>   | <i>S. Brandenburg</i> ,<br><i>S. Heidelberg</i> | -                     |              | Food (chicken breast, chicken wing), chicken cage after cleaning | Monte et al., 2019     |
| <i>fosA7</i>   | <i>C. koseri</i>                                | -                     | South Africa | sewage sludge                                                    | Ekwanzala et al., 2020 |
| <i>fosA7</i>   | -                                               | -                     | USA          | environment, clinical                                            | Hua et al., 2020       |
| <i>fosA7.5</i> | <i>E. coli</i>                                  | plasmid               | Canada       | patient                                                          | Milner et al., 2020    |
| <i>fosA7</i>   | <i>E. coli</i>                                  | chromosome            | China        | cattle, sheep, patients                                          | Pan et al., 2021       |

-, not available.

Cummings, K.J., Mitchell, P.K., Rodriguez-Rivera, L.D., and Goodman, L.B. (2020). Sequence analysis of *Salmonella enterica* isolates obtained from shelter dogs throughout Texas. *Vet. Med. Sci.* 6: 975-979. doi: 10.1002/vms3.320

de Melo, A.N.F., Monte, D.F.M., de Souza Pedrosa, G.T., Balkey, M., Jin, Q., Brown, E., et al. (2021). Genomic investigation of antimicrobial resistance determinants and virulence factors in *Salmonella enterica* serovars isolated from contaminated food and human stool samples in Brazil. *Int. J. Food Microbiol.* 343, 109091. doi: 10.1016/j.ijfoodmicro.2021.109091

Ekwanzala, M.D., Dewar, J.B., Kamika, I., and Momba, M.N.B. 2020. Genome sequence of carbapenem-resistant *Citrobacter koseri* carrying *bla<sub>OXA-181</sub>* isolated from sewage sludge. *J. Glob. Antimicrob. Resist.* 20, 94-97. doi: 10.1016/j.jgar.2019.07.011

Hua M, Huang W, Chen A, Rehmet M, Jin C, and Huang Z. 2020. Comparison of antimicrobial resistance detected in environmental and clinical isolates from historical data for the US. *Biomed. Res. Int.* 2020:4254530. doi: 10.1155/2020/4254530

- Jovčić, B., Novović, K., Filipić, B., Velhner, M., Todorović, D., Matović, K., *et al.* 2020. Genomic characteristics of colistin-resistant *Salmonella enterica* subsp. *enterica* serovar Infantis from poultry farms in the Republic of Serbia[J]. *Antibiotics*. 9, 886. doi: 10.3390/antibiotics9120886
- Keefer, A.B., Xiaoli, L., M'ikanatha, N.M., Yao, K., Hoffmann, M., *et al.* (2019). Retrospective whole-genome sequencing analysis distinguished PFGE and drug-resistance-matched retail meat and clinical *Salmonella* isolates. *Microbiology*. 165, 270-286. doi: 10.1099/mic.0.000768
- Milner, K.A., Bay, D.C., Alexander, D., Walkty, A., Karlowsky, J.A., Mulvey, M.R., *et al.* (2020). Identification and characterization of a novel FosA7 member from fosfomycin-resistant *Escherichia coli* clinical isolates from Canadian hospitals. *Antimicrob. Agents Chemother.* 65, e00865-20. doi: 10.1128/AAC.00865-20
- Monte, D.F., Lincopan, N., Berman, H., Cerdeira, L., Keelara, S., Thakur, S., *et al.* 2019. Genomic features of high-priority *Salmonella enterica* serovars circulating in the food production chain, Brazil, 2000-2016. *Sci. Rep.* 9,11058. doi: 10.1038/s41598-019-45838-0
- Monte, D.F.M., Nethery, M.A., Barrangou, R., Landgraf, M., and Fedorka-Cray, P.J. 2021. Whole-genome sequencing analysis and CRISPR genotyping of rare antibiotic-resistant *Salmonella enterica* serovars isolated from food and related sources. *Food Microbiol.* 93, 103601. doi: 10.1016/j.fm.2020.103601
- Pan, Y., Hu, B., Bai, X., Yang, X., Cao, L., Liu, Q., *et al.* (2021). Antimicrobial resistance of non-O157 shiga toxin-producing *Escherichia coli* isolated from humans and domestic animals. *Antibiotics*. 10, 74. doi: 10.3390/antibiotics10010074
- Pightling, A.W., Pettengill, J., Luo, Y., Strain, E., and Rand, H. 2020. Genomic diversity of *Salmonella enterica* isolated from papaya samples collected during multiple outbreaks in 2017. *Microbiology*. 166, 453-459. doi: 10.1099/mic.0.000895
- Rehman, M.A., Yin, X., Persaud-Lachhman, M.G., and Diarra, M.S. (2017). First detection of a fosfomycin resistance gene, *fosA7*, in *Salmonella enterica* serovar Heidelberg isolated from broiler chickens. *Antimicrob. Agents Chemother.* 61, 410-417. doi: 10.1128/AAC.00410-17

**Table S2. *Salmonella enterica* isolates obtained from July 2019 to June 2020 used in this study**

| Serovars    | Sources (no.) |        |                 |      |      | Total |
|-------------|---------------|--------|-----------------|------|------|-------|
|             | pig           | cattle | chicken<br>meat | pork | beef |       |
| Albany      |               |        | 2               |      |      | 2     |
| Anatum      |               |        | 1               | 4    |      | 5     |
| Braenderup  |               |        | 9               | 1    |      | 10    |
| Corvallis   |               |        | 3               |      |      | 3     |
| Derby       |               | 7      |                 | 18   | 1    | 26    |
| Enteritidis |               |        | 9               |      |      | 9     |
| Give        |               |        | 1               | 1    |      | 2     |
| Goldcoast   |               |        |                 | 7    |      | 7     |
| Indiana     |               |        | 19              |      |      | 19    |
| Infantis    |               |        |                 | 1    |      | 1     |
| Kentucky    | 1             |        | 33              | 1    |      | 35    |
| Kottbus     |               |        | 2               |      |      | 2     |
| Litchfield  |               |        |                 | 6    |      | 6     |
| Livingstone |               |        |                 | 4    |      | 4     |
| London      | 4             |        | 3               | 20   | 16   | 43    |
| Mbandaka    |               | 1      |                 |      |      | 1     |
| Newport     |               |        |                 | 10   |      | 10    |
| Putten      |               |        | 2               |      |      | 2     |
| Rissen      | 2             |        | 2               | 19   | 1    | 24    |
| Saintpaul   |               |        | 2               | 7    |      | 9     |
| Senftenberg |               |        |                 | 1    |      | 1     |
| Thompson    |               |        | 2               |      |      | 2     |
| Typhimurium | 4             |        | 1               | 28   | 1    | 34    |
| Uganda      |               |        |                 | 7    |      | 7     |

**Table S3. Primers used to delete *fosA7* in *S. Derby* HA2-WA5**

| Primer name         | Primer sequence (5 to 3)                                 | Size (bp) |
|---------------------|----------------------------------------------------------|-----------|
| <i>fosA7</i> -UpF   | GAGCGGATAACAATTTGTGGAATCCCGGGAAGCTGATGATATGCTTTTTTCGCAAG | 436       |
| <i>fosA7</i> -UpR   | CTAAATCTCCTGCAAATTACTGACAGCAAGCGTTA                      |           |
| <i>fosA7</i> -DownF | GTAATTTGCAGGAGATTTAGCATCCCGACTGACGC                      | 377       |
| <i>fosA7</i> -DownR | AGCGGAGTGTATATCAAGCTTATCGATACCTGTACATTCAAGACATTATTGCAGA  |           |
| <i>fosA7</i> -InF   | TGTTGAGTGGGATACTGGCGCTTAC                                | 229       |
| <i>fosA7</i> -InR   | CGGATCAAGAAAATAGAAAGATTGC                                |           |
| <i>fosA7</i> -OutF  | AGCTGATGATATGCTTTTTTCGCAAG                               | 1571      |
| <i>fosA7</i> -OutR  | TCTCGTCAGCGATGTCTTCCT                                    | (1270)    |

**Table S4. MICs of fosfomycin against parental strains and pBR322-*fosA7* transformations**

| Strains                            | Fosfomycin MIC (mg/L) |
|------------------------------------|-----------------------|
| <i>E. coli</i> DH5 $\alpha$        | 0.25                  |
| DH5 $\alpha$ -pBR322               | 0.25                  |
| DH5 $\alpha$ -pBR322- <i>fosA7</i> | 4                     |
| <i>S. Typhimurium</i> SL1344       | 0.5                   |
| SL1344-pUC57                       | 0.5                   |
| SL1344-pUC57-tetA-variant          | 512                   |
| <i>S. Pullorum</i> C79-13          | 0.5                   |
| C79-13-pBR322                      | 0.5                   |
| C79-13-pBR322- <i>fosA7</i>        | 512                   |
| <i>S. Enteritidis</i> P125109      | 0.5                   |
| P125109-pBR322                     | 0.5                   |
| P125109-pBR322- <i>fosA7</i>       | 512                   |
| <i>S. Derby</i> 14C-S8N4           | 0.5                   |
| 14C-S8N4-pBR322                    | 0.5                   |
| 14C-S8N4                           | 512                   |

1 kb

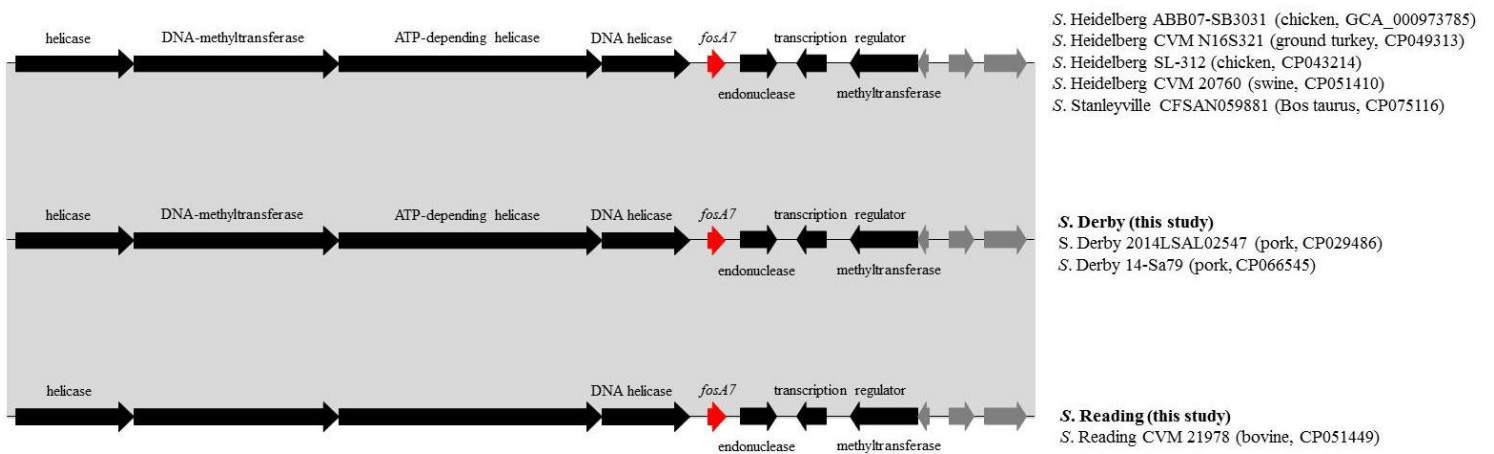

**Figure S1.** Genetic environment of *fosA7* and its neighboring region (~24.3 kb) in *Salmonella* Derby and *Salmonella* Reading isolates in this study and comparison with other *fosA7*-carrying regions in *Salmonella*. Regions with > 98% homology are shaded in gray.

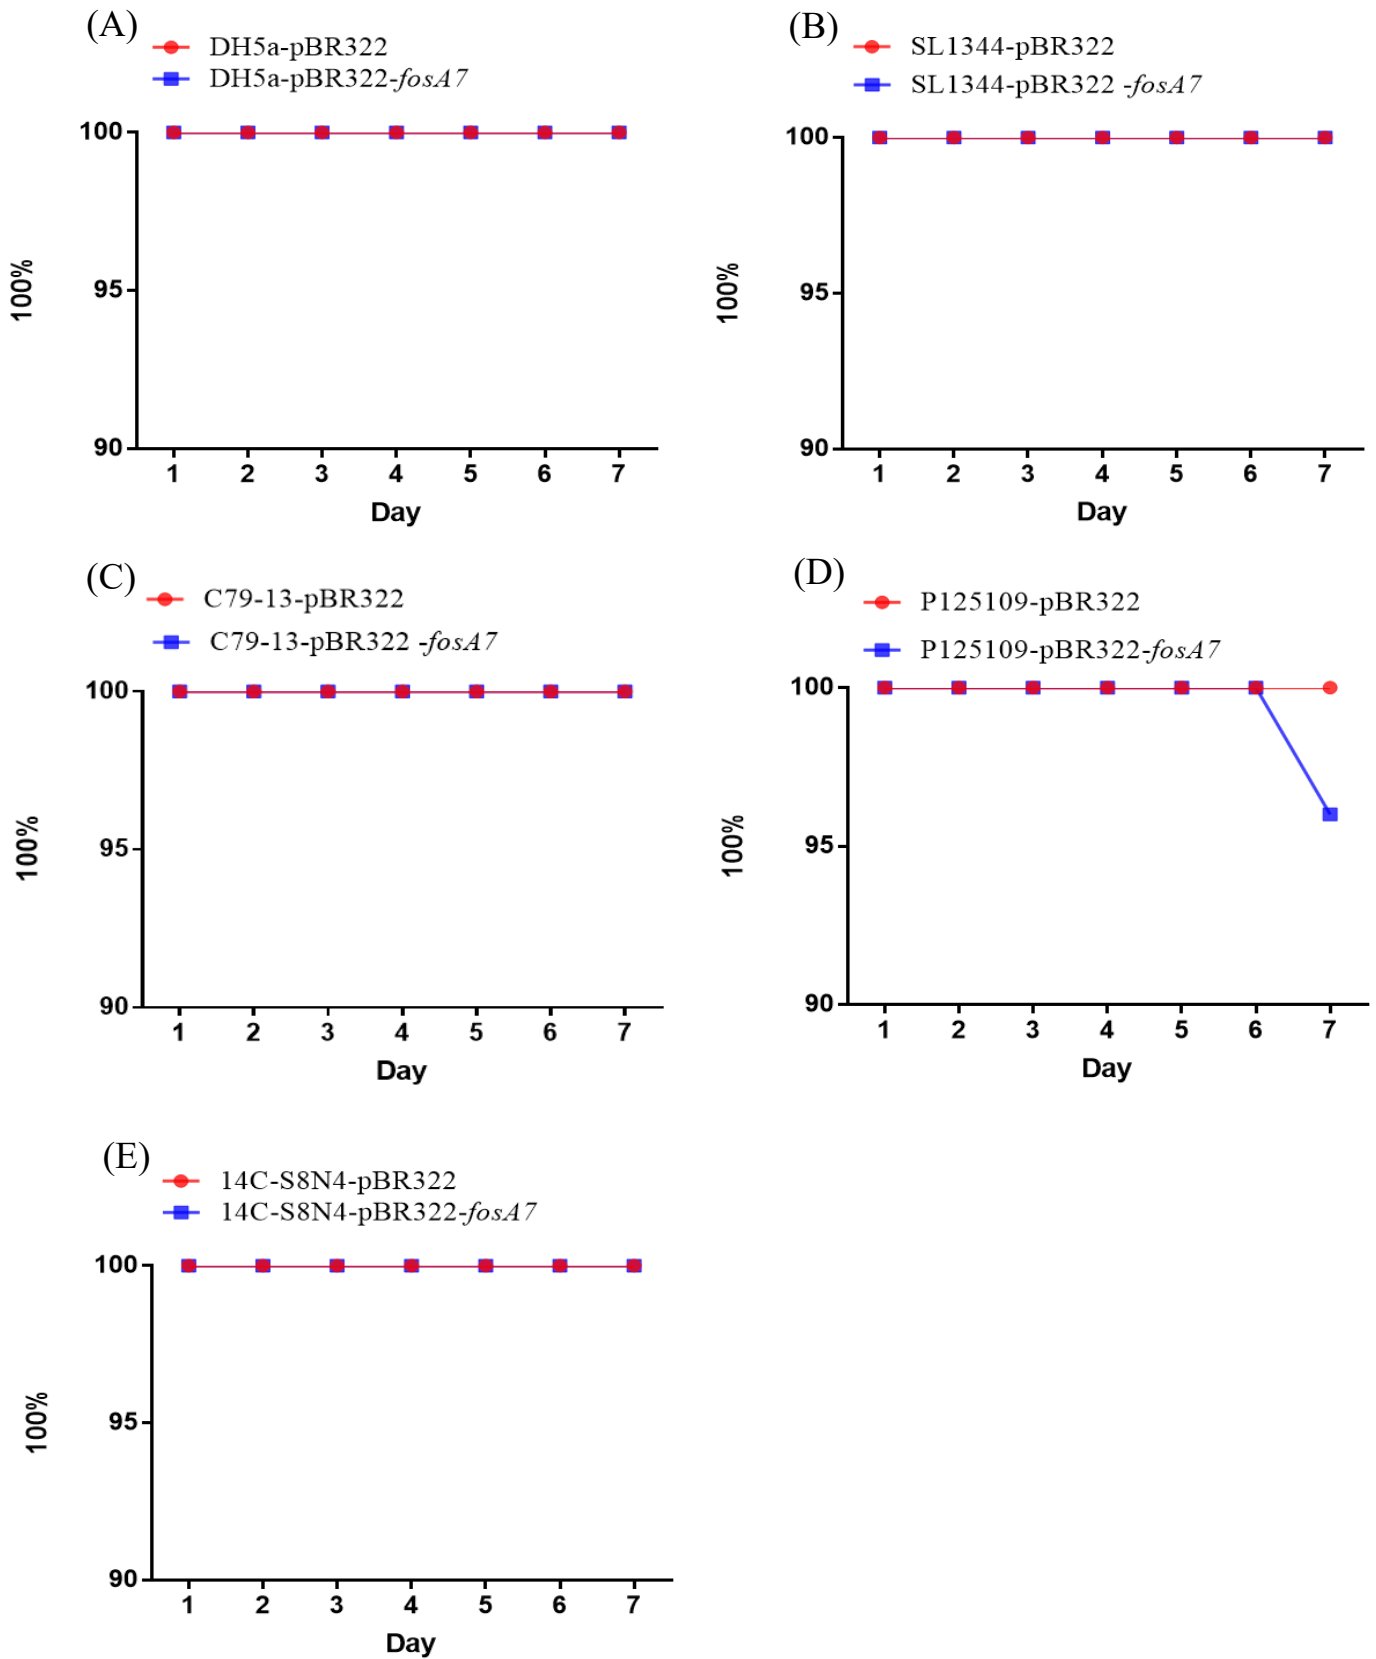

**Figure S2.** Plasmid stability of pBR322 and pBR322-*fosA7* in *E. coli* and *Salmonella*. (A) *E. coli* DH5 $\alpha$ ; (B) *S.* Typhimurium SL1344; (C) *S.* Pullorum C79-13; (D) *S.* Enteritidis P125109; (E) *S.* Derby 14C-S8N4.
